# Supplementary material for: Implications of the Wnt5a/CaMKII Pathway in Retinoic Acid-Induced Myogenic Tongue Abnormalities of Developing Mice
Source: PubMed Central journal article supplement (PMC4133706; doi:10.1038/srep06082), 2014-08-15
Supplement: srep06082-s1.pdf [file srep06082-s1.pdf]

Supplementary Information

**Implications of the Wnt5a/CaMKII Pathway in Retinoic Acid-Induced Myogenic  
Tongue Abnormalities of Developing Mice**

W Cong<sup>1</sup>, B Liu<sup>1</sup>, S Liu<sup>2</sup>, M Sun<sup>3</sup>, H Liu<sup>1</sup>, Y Yang<sup>1</sup>, R Wang<sup>4</sup> and J Xiao<sup>1\*</sup>

Supplementary Figure S1

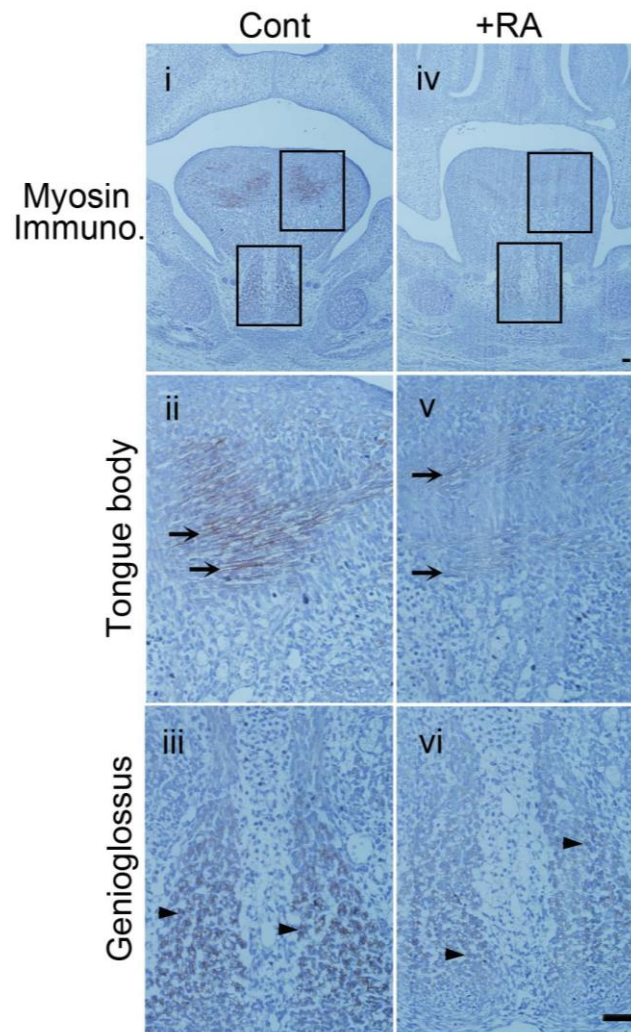

**Supplementary Figure S1. Myosin immunocytochemical staining of tongue muscles at E14.5.**

In crown sections of the heads, myosin expressions in the tongue intrinsic muscle and the genioglossus muscle were apparently decreased in the +RA fetus (**iv**) versus control fetus (**i**). Bar = 100  $\mu$ m. A higher magnification of the tongue intrinsic muscle from control fetuses showed multinucleated myotubes expressing myosin (**ii**, arrow). In +RA fetuses, myosin expression in myotubes (**v**, arrow) became weaker. Myosin was expressed at high levels in the control myotubes (**iii**, arrowhead); in +RA fetuses, myosin staining was very weak (**vi**, arrowhead). Bar = 40  $\mu$ m. Cont.: control mouse fetus; +RA: RA-exposed mouse fetus.

Supplementary Figure S2

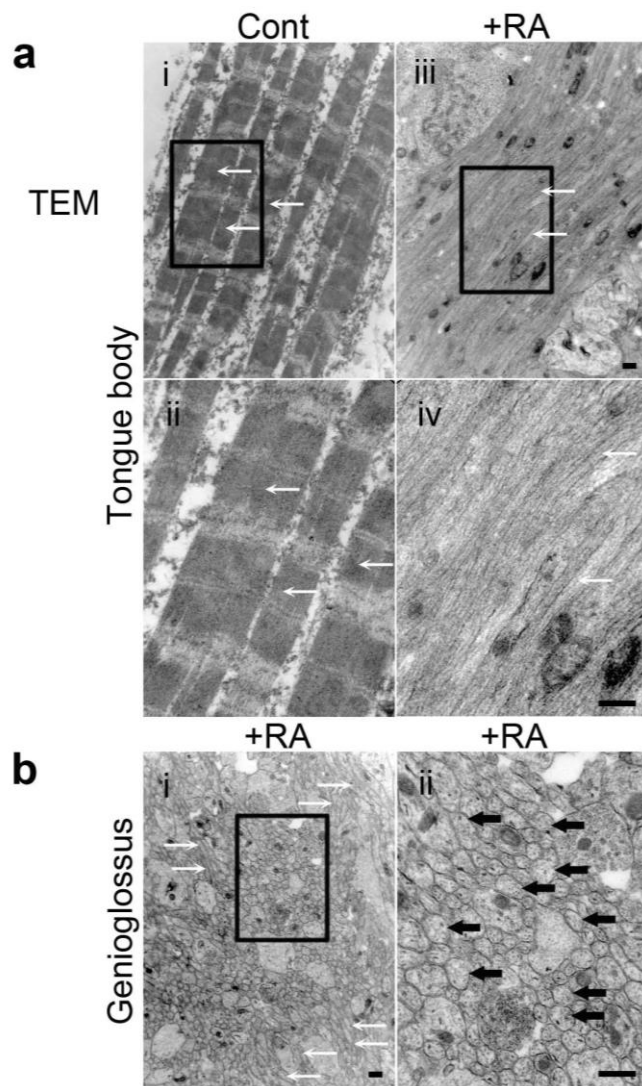

**Supplementary Figure S2. Ultrastructural changes of fetal tongue by transmission electron microscopy examination at E18.5**

(a): Transverse sections of the tongue body. In control (i, ii), myofibrils (white arrow) contained definitive sarcomere structures. In +RA (iii, iv), the classic structures of sarcomeres of myofibrils were not found, only the structures of myofilaments (white arrow) can be detected. (b): Sagittal sections of the genioglossus in +RA fetus. (i, ii) A great amount of myofilament bundles were arranged transversely (black arrow) among obliquely arranged bundles (white arrow). Bar =

500 nm. Cont.: control mouse fetus; +RA: RA-exposed mouse fetus.

Supplementary Figure S3

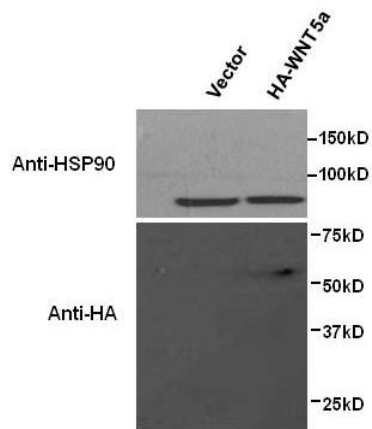

**Supplementary Figure S3. Uncropped images of Western blot.**
